# Supplementary material for: Discovery and Biosynthesis of the Antibiotic Bicyclomycin in Distantly Related Bacterial Classes
Source: Appl Environ Microbiol. 2018 Apr 16;84(9):e02828-17. doi: 10.1128/AEM.02828-17 (PMC5930311; doi:10.1128/AEM.02828-17)
Supplement: Supplemental material [file AEM.02828-17_zam009188489s1.pdf]

## SUPPLEMENTAL MATERIAL

### Discovery and biosynthesis of the antibiotic bicyclomycin in distant bacterial classes

Natalia M. Vior, Rodney Lacret, Govind Chandra, Siobhán Dorai-Raj, Martin Trick,  
Andrew W. Truman

#### TABLE OF CONTENTS

**Table S1.** Statistics of the *S. cinnamoneus* DSM 41675 genome sequence assemblies.

**Table S2.** *bcm* gene clusters in *S. cinnamoneus* DSM 41675 and *P. aeruginosa* SCV20265.

**Figure S1.** Alignment of a *P. aeruginosa* CDPS with BcmA from *S. cinnamoneus*.

**Figure S2.** MRM analysis of bicyclomycin from *S. cinnamoneus*.

**Figure S3.** MS and MS<sup>2</sup> spectra for bicyclomycin from *Pseudomonas*.

**Figure S4.** Comparison of the LC-MS spectra of *P. fluorescens* SBW25-pJH-BCMclp-PA and an empty vector control.

**Table S3.** Exact masses of the BCM-like compounds produced by *Pseudomonas*.

**Figure S5.** Main <sup>1</sup>H-<sup>13</sup>C HMBC correlations identified for bicyclomycin from *Pseudomonas*.

**Table S4.** <sup>1</sup>H and <sup>13</sup>C NMR data for BCM produced by *Pseudomonas* in CD<sub>3</sub>SOCD<sub>3</sub>.

**Figure S6.** 400 MHz <sup>1</sup>H NMR spectrum of BCM produced by *Pseudomonas* in CD<sub>3</sub>SOCD<sub>3</sub>.

**Figure S7.** 100 MHz <sup>13</sup>C NMR spectrum of BCM produced by *Pseudomonas* in CD<sub>3</sub>SOCD<sub>3</sub>.

**Figure S8.** 400 MHz <sup>1</sup>H-<sup>13</sup>C HSQC NMR spectrum of BCM produced by *Pseudomonas* in CD<sub>3</sub>SOCD<sub>3</sub>.

**Figure S9.** 400 MHz <sup>1</sup>H-<sup>1</sup>H COSY NMR spectrum of BCM produced by *Pseudomonas* in CD<sub>3</sub>SOCD<sub>3</sub>.

**Figure S10.** 400 MHz  $^1\text{H}$ - $^{13}\text{C}$  HMBC NMR spectrum of BCM produced by *Pseudomonas* in  $\text{CD}_3\text{SOCD}_3$ .

**Table S5.** Mobile genetic elements and tRNA genes surrounding the *bcm* cluster in different bacteria.

**Figure S11.** Genomic context of the *bcm* cluster in *P. aeruginosa*.

**Figure S12.** Genomic context of the *bcm* cluster in *Mycobacterium*.

**Figure S13.** Alignment and percentage identity matrix of the *bcm* 2-OG/Fe dioxygenases from *S. cinnamomeus*.

**Figure S14.** Unrooted version of the phylogenetic tree shown in Fig. 6.

|                     | Illumina only<br>assembly | Nanopore only<br>assembly | Hybrid<br>assembly |
|---------------------|---------------------------|---------------------------|--------------------|
| Sequence size       | 6,802,277                 | 6,597,724                 | 6,662,690          |
| Number of contigs   | 415                       | 4                         | 2                  |
| GC content (%)      | 72.4                      | 72.3                      | 72.4               |
| Longest contig size | 896,920                   | 4,033,611                 | 6,463,510          |
| N50 value           | 403,337                   | 4,033,611                 | 6,463,510          |
| L50 value           | 6                         | 1                         | 1                  |

**Table S1.** Statistics of the different *S. cinnamoneus* DSM 41675 genome sequence assemblies described in this work.

| Gene               | Locus tag in<br><i>S. cinnamomeus</i><br>DSM 41675 | Locus tag in<br><i>P. aeruginosa</i><br>SCV20265 | Gene product                              | Size (aa) in<br>Scin/Paer |
|--------------------|----------------------------------------------------|--------------------------------------------------|-------------------------------------------|---------------------------|
| <b><i>bcmA</i></b> | CYQ11_26550                                        | SCV20265_RS31155                                 | tRNA-dependent<br>cyclodipeptide synthase | 241/244                   |
| <b><i>bcmB</i></b> | CYQ11_26545                                        | SCV20265_RS31160                                 | 2OG-Fe(II) oxygenase                      | 325/322                   |
| <b><i>bcmC</i></b> | CYQ11_26540                                        | SCV20265_RS31165                                 | 2OG-Fe(II) oxygenase                      | 305/313                   |
| <b><i>bcmD</i></b> | CYQ11_26535                                        | SCV20265_RS31170                                 | Cytochrome P450                           | 488/476                   |
| <b><i>bcmE</i></b> | CYQ11_26530                                        | SCV20265_RS31175                                 | 2OG-Fe(II) oxygenase                      | 314/293                   |
| <b><i>bcmF</i></b> | CYQ11_26525                                        | SCV20265_RS31180                                 | 2OG-Fe(II) oxygenase                      | 296/315                   |
| <b><i>bcmG</i></b> | CYQ11_26520                                        | SCV20265_RS31185                                 | 2OG-Fe(II) oxygenase                      | 300/296                   |
| <b><i>bcmT</i></b> | CYQ11_26555                                        | SCV20265_RS31190                                 | MFS transporter                           | 473/401                   |

**Table S2.** *bcm* gene clusters in *S. cinnamomeus* DSM 41675 and *P. aeruginosa* SCV20265.

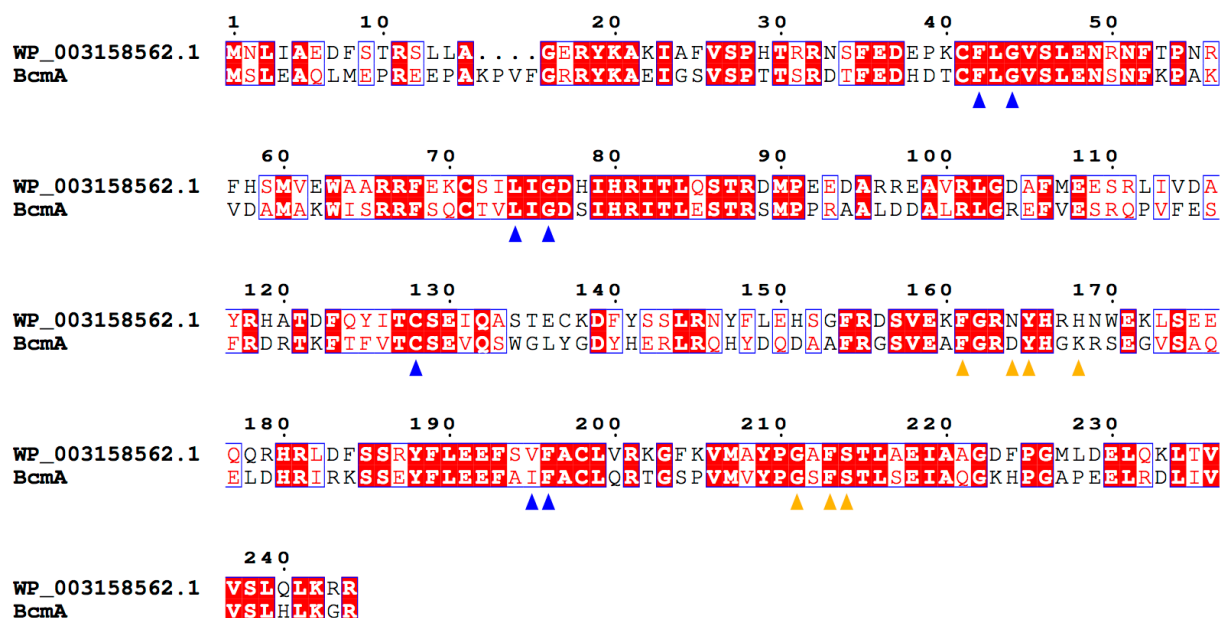

**Figure S1.** Alignment of a *P. aeruginosa* CDPS (WP\_003158562.1) with selectivity for cyclo(L-Ile-L-Leu) and BcmA from *S. cinnamomeus*. Specificity-determining residues are highlight for P1 (blue triangles) and P2 (orange triangles) binding pockets, as determined by Jacques *et al.* (1). Identical residues have a red background while similar residues have red lettering. Figure generated using Esprint 3.0 (2).

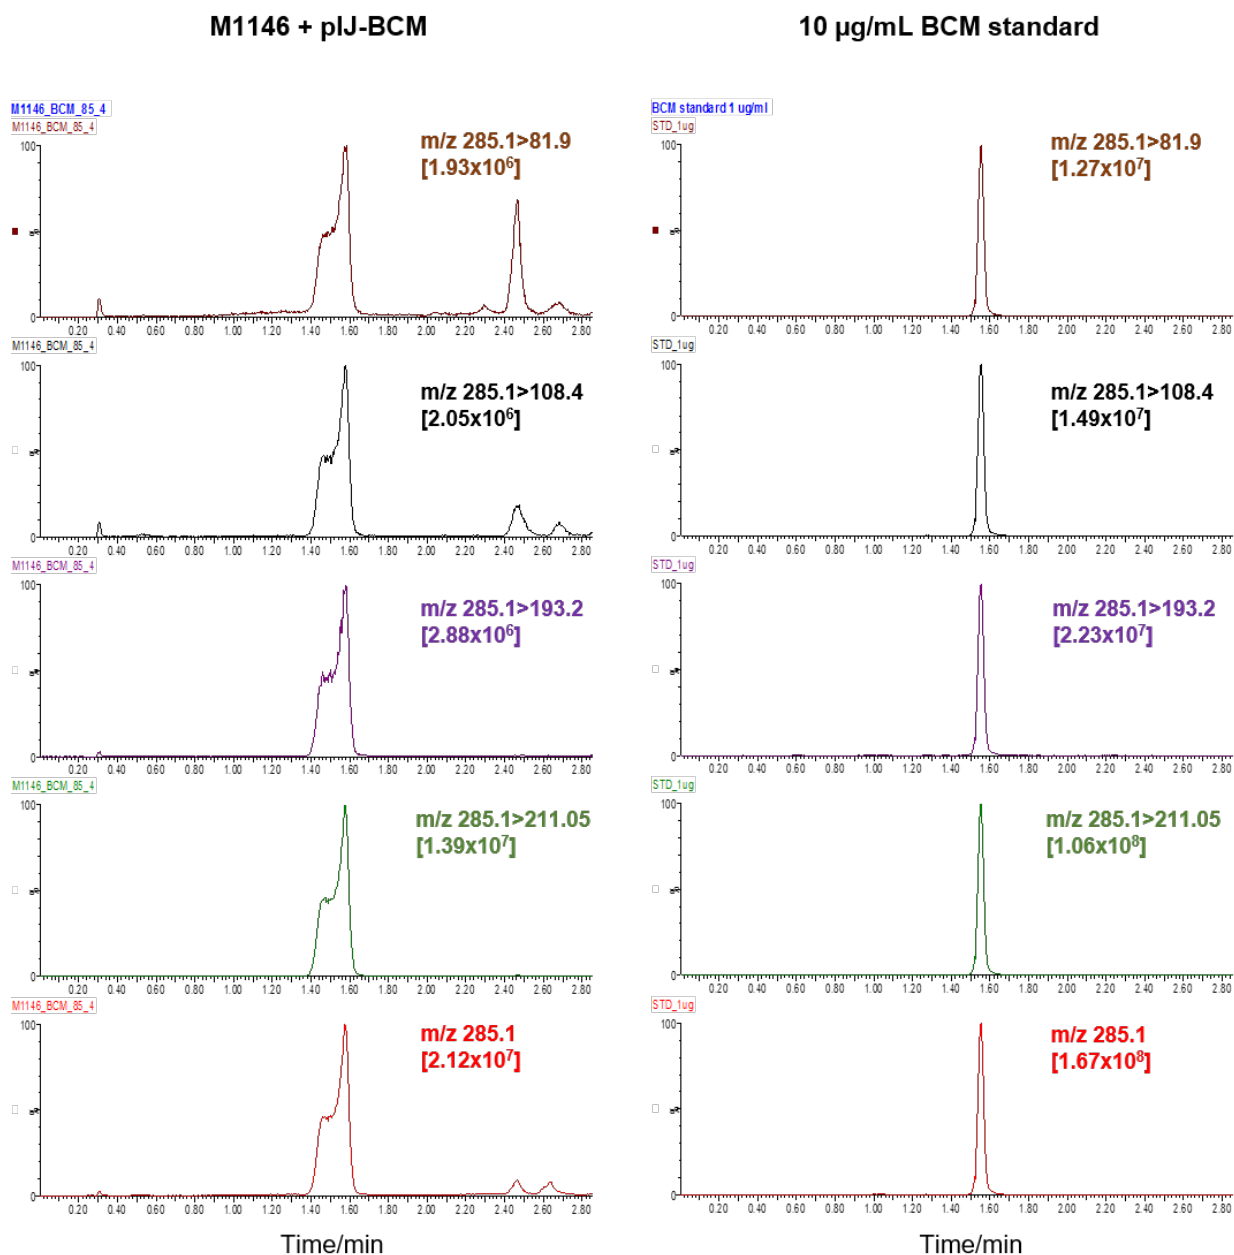

**Figure S2.** Multiple Reaction Monitoring (MRM) analysis of bicyclomycin (parent ion  $m/z$  285.1,  $[M-H_2O+H]^+$ ) produced by the heterologous expression strain M1146 carrying pIJ-BCM (left) compared with a pure BCM standard (right). The measured intensity for each monitored transition is indicated in brackets.

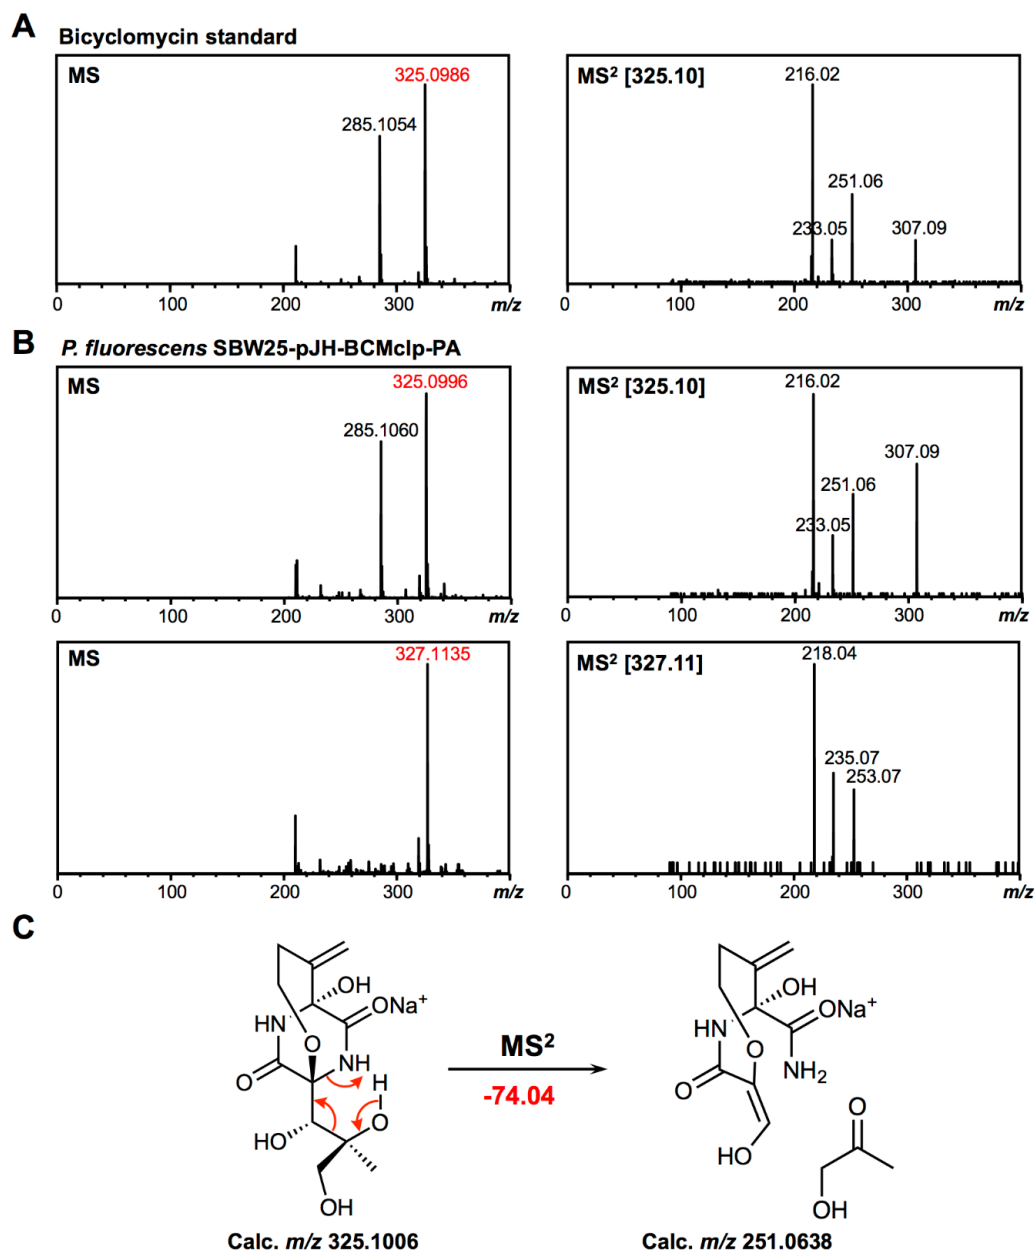

**Figure S3.** MS and MS<sup>2</sup> spectra for bicyclomycin. (A) MS spectrum for a commercial standard of BCM and MS<sup>2</sup> spectra for [BCM+Na]<sup>+</sup>. (B) MS and MS<sup>2</sup> spectra for compounds with *m/z* 325.10 and *m/z* 327.11 produced by *P. fluorescens* SBW25-pJH-BCMclp-PA. (C) Proposed fragmentation mechanism leading to the loss of 74.04 Da. An alternative mechanism would involve opening of the ether instead of breaking the C-N bond.

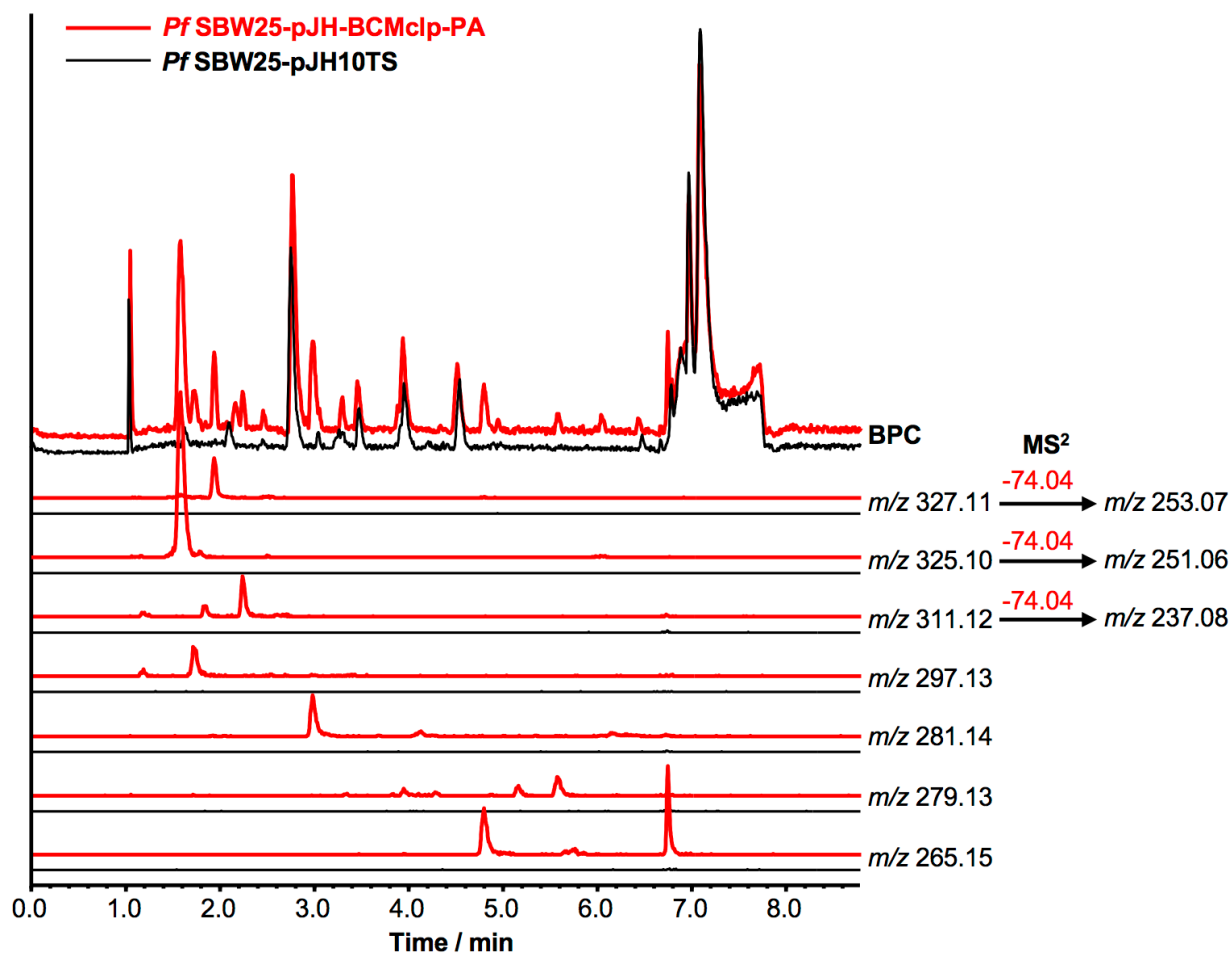

**Figure S4.** Comparison of the LC-MS spectra of *P. fluorescens* SBW25-pJH-BCMclp-PA (red) and an empty vector control (black). Extracted ion chromatograms are shown for putative  $[M+Na]^+$  signals for the major metabolites that differed between these two fermentations (BPC = base peak chromatogram). Compounds with a BCM-like loss of 74.04 Da are highlighted.

| Predicted compound | [M+Na] <sup>+</sup> chemical formula                                         | Pred. <i>m/z</i> | Obs. <i>m/z</i> | Error (ppm) |
|--------------------|------------------------------------------------------------------------------|------------------|-----------------|-------------|
| <b>BCM</b>         | C <sub>12</sub> H <sub>18</sub> N <sub>2</sub> NaO <sub>7</sub> <sup>+</sup> | 325.1006         | 325.1008        | -0.62       |
| <b>BCM+2H</b>      | C <sub>12</sub> H <sub>20</sub> N <sub>2</sub> NaO <sub>7</sub> <sup>+</sup> | 327.1163         | 327.1163        | 0.00        |
| <b>BCM+2H-O</b>    | C <sub>12</sub> H <sub>22</sub> N <sub>2</sub> NaO <sub>5</sub> <sup>+</sup> | 311.1214         | 311.1208        | 1.93        |
| <b>BCM+4H-2O</b>   | C <sub>12</sub> H <sub>22</sub> N <sub>2</sub> NaO <sub>5</sub> <sup>+</sup> | 297.1421         | 297.1420        | 0.34        |
| <b>BCM+4H-3O</b>   | C <sub>12</sub> H <sub>22</sub> N <sub>2</sub> NaO <sub>4</sub> <sup>+</sup> | 281.1472         | 281.1467        | 1.78        |
| <b>BCM+2H-3O</b>   | C <sub>12</sub> H <sub>20</sub> N <sub>2</sub> NaO <sub>4</sub> <sup>+</sup> | 279.1315         | 279.1310        | 1.79        |
| <b>BCM+4H-4O</b>   | C <sub>12</sub> H <sub>22</sub> N <sub>2</sub> NaO <sub>3</sub> <sup>+</sup> | 265.1523         | 265.1520        | 1.13        |

**Table S3.** Exact masses of the BCM-like compounds produced by *P. fluorescens* SBW25-pJH-BCMclp-PA.

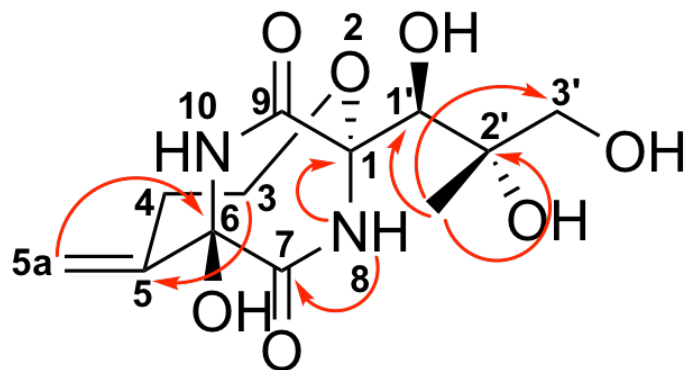

**Figure S5.** Main  $^1\text{H}$ - $^{13}\text{C}$  HMBC correlations identified for bicyclomycin produced by SBW25-pJH-BCMclp-PA. Atom numbering relates to Table S3 and is identical to compound numbering in Kohn *et al.* (3).

| Position                 | $\delta_{\text{H}}$ , mult. ( <i>J</i> in Hz) | $\delta_{\text{C}}$    |
|--------------------------|-----------------------------------------------|------------------------|
| <b>1</b>                 | -                                             | 87.8, C                |
| <b>3</b>                 | 3.60, dd, 12.6, 8.5<br>3.79, dd, 12.6, 6.2    | 63.3, CH <sub>2</sub>  |
| <b>4</b>                 | 2.48, ddd, 14.3, 8.5, 6.2                     | 35.3, CH <sub>2</sub>  |
| <b>5</b>                 | -                                             | 149.1, C               |
| <b>5a</b>                | 5.04, br s; 5.35, d, 1.8                      | 115.2, CH <sub>2</sub> |
| <b>6-OH</b>              | 6.88, s                                       | -                      |
| <b>6</b>                 | -                                             | 81.5, C                |
| <b>7</b>                 | -                                             | 169.6, C               |
| <b>8-NH</b>              | 8.72, s                                       | -                      |
| <b>9</b>                 | -                                             | 166.3, C               |
| <b>10-NH</b>             | 8.96, s                                       | -                      |
| <b>1'</b>                | 3.89, d, 7.1                                  | 70.3, C                |
| <b>1'-OH</b>             | 5.32, d, 7.5                                  | -                      |
| <b>2'</b>                | -                                             | 77.1, C                |
| <b>2'-CH<sub>3</sub></b> | 1.16, s                                       | 23.9, CH <sub>3</sub>  |
| <b>2'-OH</b>             | 4.53, s                                       | -                      |
| <b>3'</b>                | 1.29, m                                       | 66.3, CH <sub>2</sub>  |
| <b>3'-OH</b>             | 5.27, br s                                    | -                      |

**Table S4.** <sup>1</sup>H and <sup>13</sup>C NMR data for bicyclomycin produced by SBW25-pJH-BCMclp-PA in CD<sub>3</sub>SOCD<sub>3</sub>.

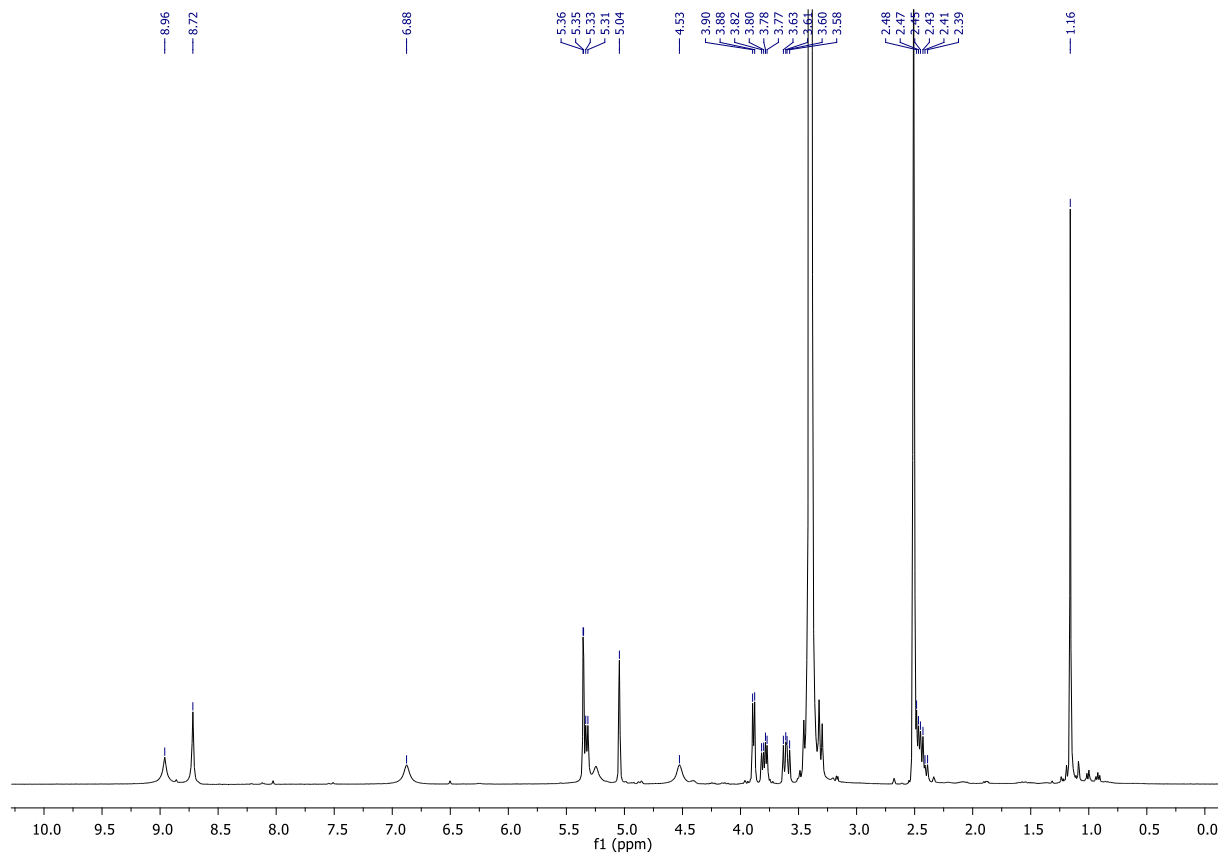

**Figure S6.** 400 MHz  $^1\text{H}$  NMR spectrum of bicyclomycin produced by SBW25-pJH-BCMclp-PA in  $\text{CD}_3\text{SOCD}_3$ .

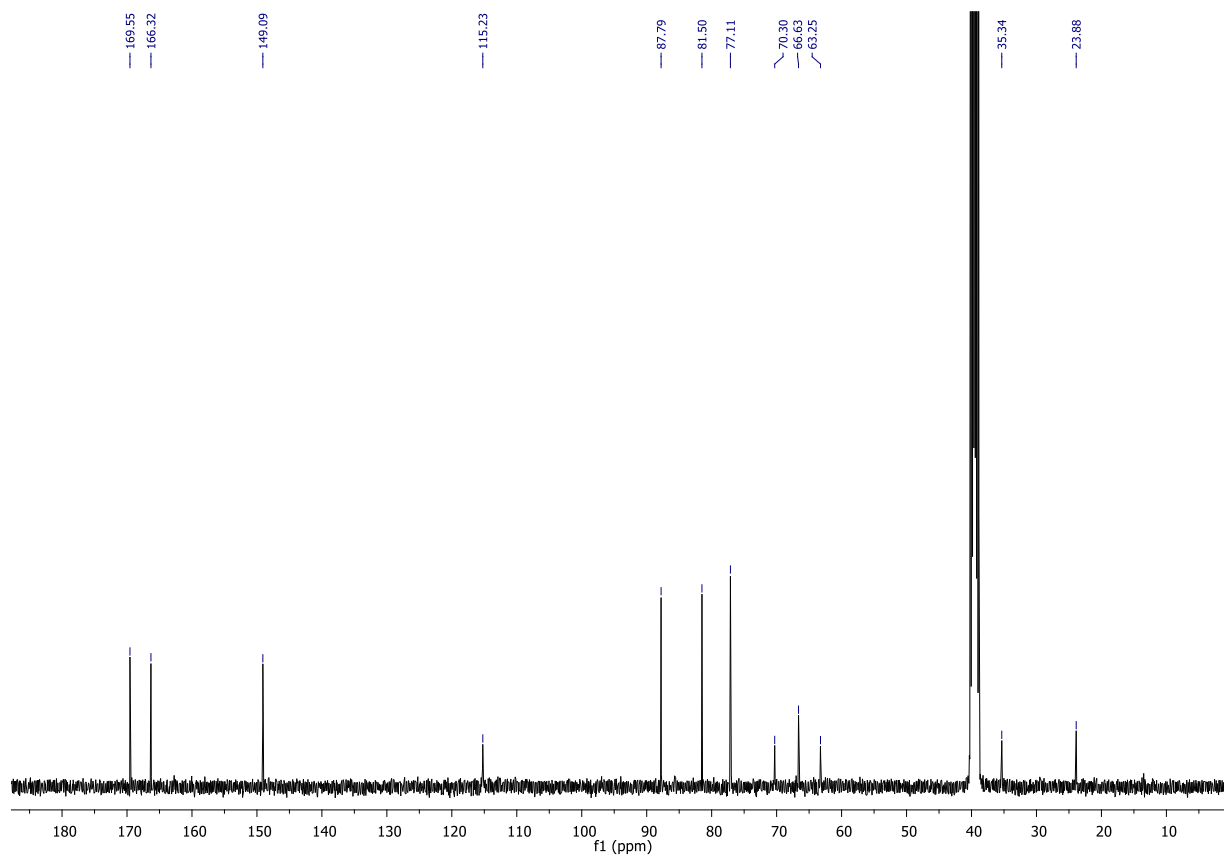

**Figure S7.** 100 MHz  $^{13}\text{C}$  NMR spectrum of bicyclomycin produced by SBW25-pJH-BCMclp-PA in  $\text{CD}_3\text{SOCD}_3$ .

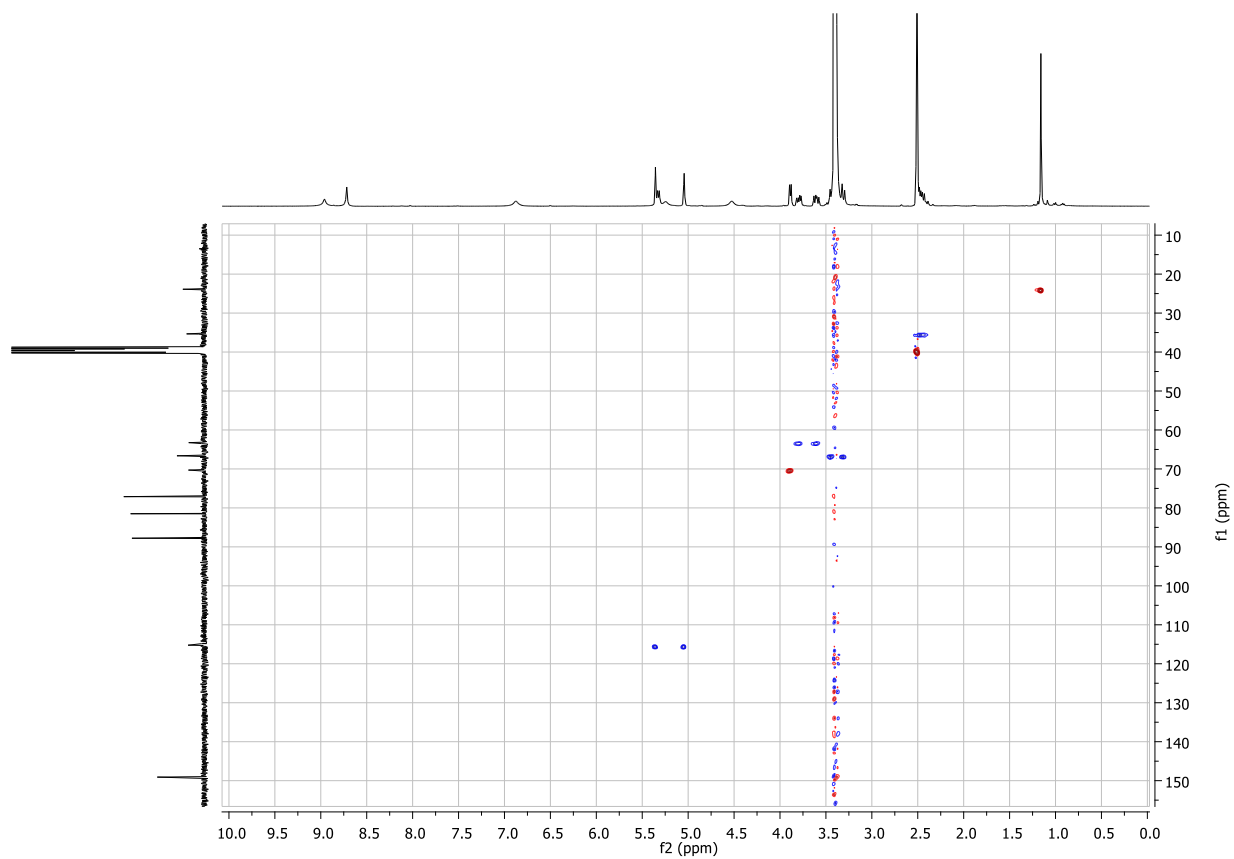

**Figure S8.** 400 MHz  $^1\text{H}$ - $^{13}\text{C}$  HSQC NMR spectrum of bicyclomycin produced by SBW25-pJH-BCMclp-PA in  $\text{CD}_3\text{SOCD}_3$ .

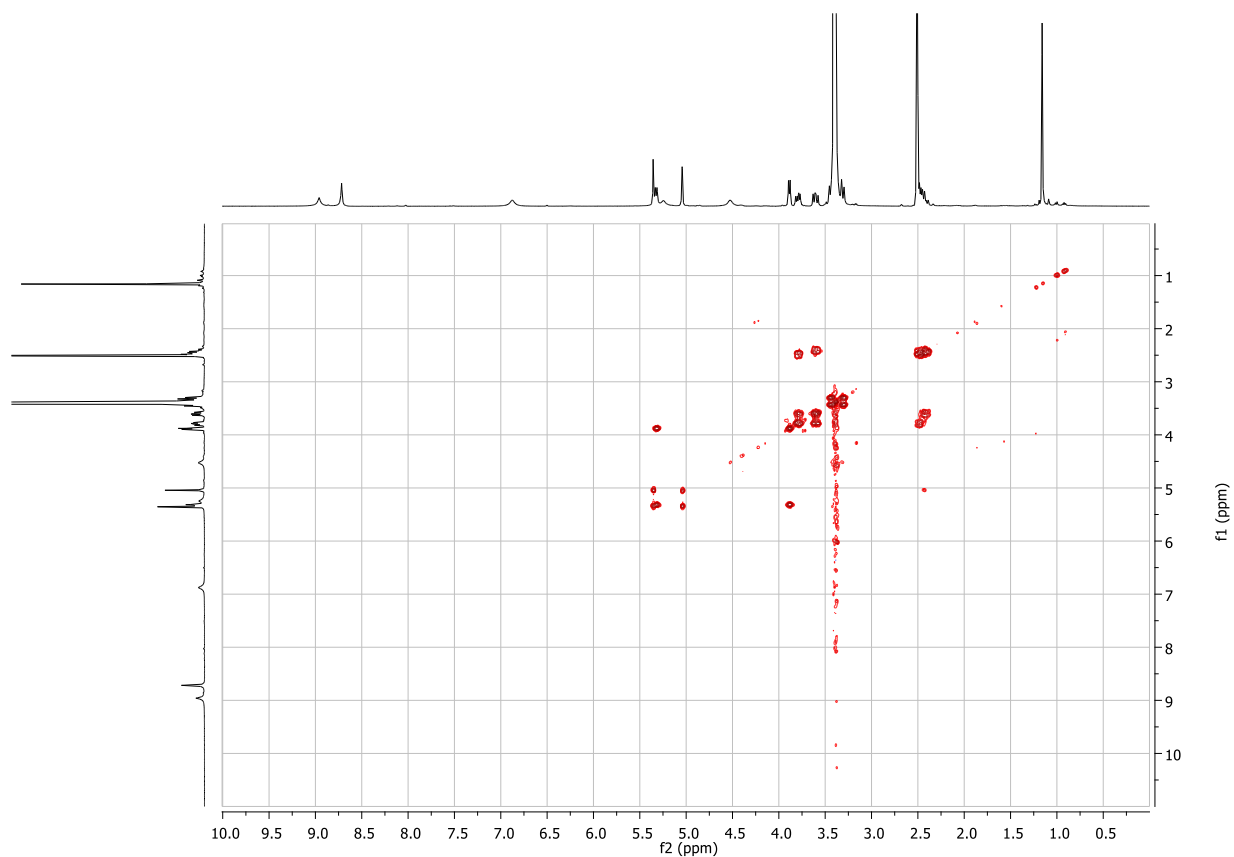

**Figure S9.** 400 MHz  $^1\text{H}$ - $^1\text{H}$  COSY NMR spectrum of bicyclomycin produced by SBW25-pJH-BCMclp-PA in  $\text{CD}_3\text{SOCD}_3$ .

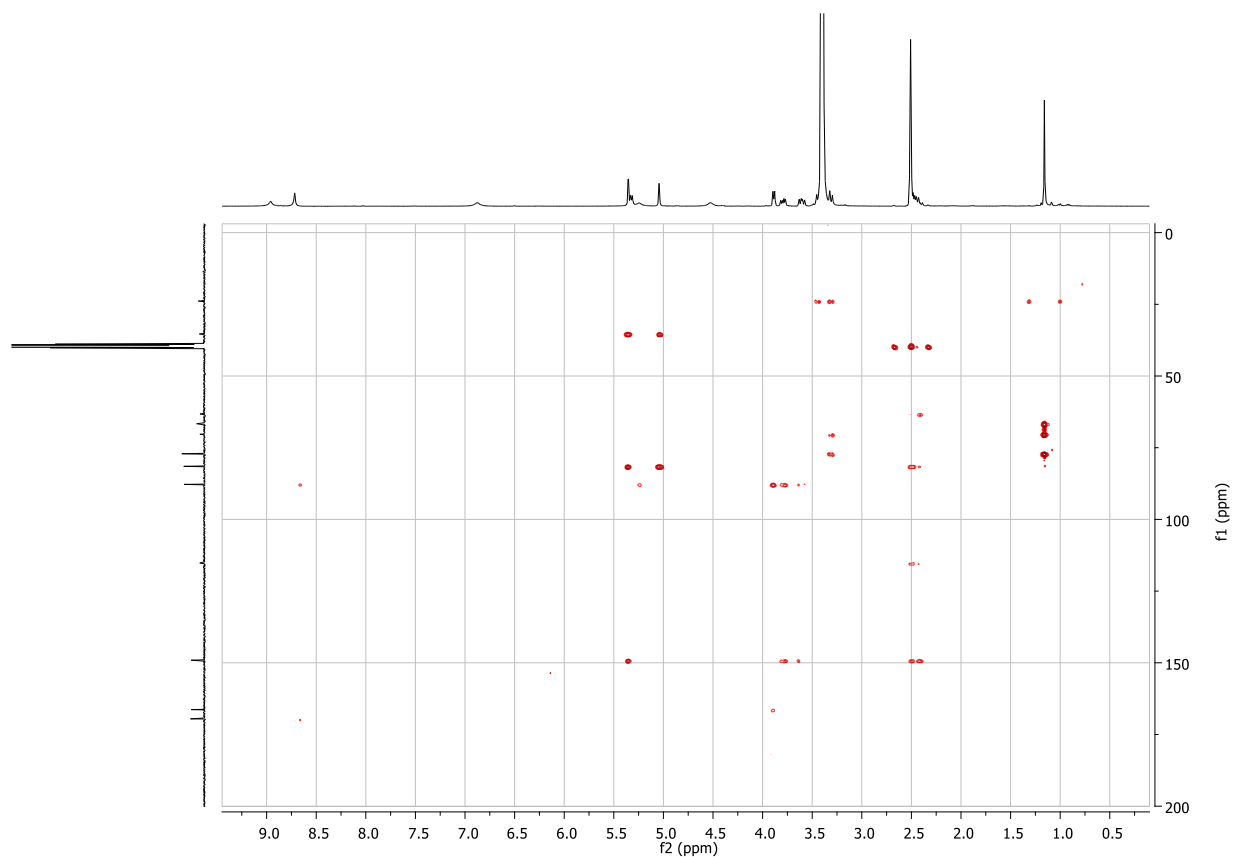

**Figure S10.** 400 MHz <sup>1</sup>H-<sup>13</sup>C HMBC NMR spectrum of bicyclomycin produced by SBW25-pJH-BCMclp-PA in CD<sub>3</sub>SOCD<sub>3</sub>.

| Strain                                  | Locus tag                                                                         | Mobile genetic element                                                         | Conserved domain       |
|-----------------------------------------|-----------------------------------------------------------------------------------|--------------------------------------------------------------------------------|------------------------|
| <i>M. chelonae</i><br>CCUG 47445        | BB28_RS01095<br>BB28_RS01100                                                      | tRNA-Ser<br>tRNA-Arg                                                           |                        |
| <i>M. chelonae</i><br>D16R20            | B4407_RS03550<br>B4407_RS03545                                                    | tRNA-Ser<br>tRNA-Arg                                                           |                        |
| <i>M. chelonae</i><br>D16R2             | B4391_RS18230<br>B4391_RS18235                                                    | tRNA-Ser<br>tRNA-Arg                                                           |                        |
| <i>M. chelonae</i><br>15513             | BKG80_RS00985<br>BKG80_RS00990                                                    | tRNA-Ser<br>tRNA-Arg                                                           |                        |
| <i>M. chelonae</i><br>15514             | BKG81_RS06600<br>BKG81_RS06660<br>BKG81_RS06665<br>BKG81_RS06670<br>BKG81_RS06675 | Resolvase<br>Site-specific phage integrase<br>tRNA-Phe<br>tRNA-Asp<br>tRNA-Glu | pfam00239<br>pfam00589 |
| <i>W. herbipolensis</i><br>ARP1         | TU34_RS19365                                                                      | IS110 family transposase                                                       | pfam02371/pfam01548    |
| <i>S. hygroscopicus</i><br>XM201        | ---                                                                               | ---                                                                            | ---                    |
| <i>S. violaceusniger</i><br>NRRL F-8817 | ADL28_RS46050                                                                     | Transposase DDE_Tnp_1_4 domain-containing protein                              | pfam13701              |
|                                         | ADL28_RS46040                                                                     | Tn3 transposase DDE domain-containing protein                                  | Pfam01526              |
|                                         | ADL28_RS16000                                                                     | Tn3 transposase DDE domain-containing protein                                  | Pfam01526              |
| <i>S. castelarensis</i><br>NRRL B-24289 | BZY55_RS12845                                                                     | Serine recombinase (resolvase domain)                                          | cd03768/ pfam00239     |
|                                         | BZY55_RS12840                                                                     | Transposase DDE_Tnp_1_4 domain-containing protein                              | pfam13701              |
|                                         | BZY55_RS12795                                                                     | Tn3 transposase DDE domain- containing protein                                 | pfam01526              |
| <i>S. kanamyceticus</i><br>NRRL B-2535  | ---                                                                               | ---                                                                            | ---                    |
| <i>S. formicae</i><br>KY5               | ---                                                                               | ---                                                                            | ---                    |
| <i>S. cinnamoneus</i><br>DSM 41675      | ---                                                                               | ---                                                                            | ---                    |
| <i>S. platensis</i><br>DSM 40041        | BG653_RS05930                                                                     | Transposase DDE_Tnp_4 superfamily endonuclease                                 | pfam13359              |
| <i>S. ossamyceticus</i><br>NRRL B-3822  | ---                                                                               | ---                                                                            | ---                    |
| <i>A. spheciospongae</i><br>EG49        | UO65_RS00270                                                                      | Integrase                                                                      | pfam00665/ pfam13683   |
|                                         | UO65_RS00275                                                                      | Transposase DDE domain-containing protein                                      | pfam01609              |
| <i>T. mobilis</i><br>MCCC 1A02139       | AUP44_RS28005                                                                     | Putative IS4/5 family transposase                                              | pfam13340              |
| <i>B. plantarii</i><br>ATCC 43733       | bpln_RS33885                                                                      | Transposase DDE_Tnp_1_5 superfamily endonuclease                               | pfam13737              |
|                                         | bpln_RS33900                                                                      | Putative IS4/5 family transposase                                              | pfam13340              |
|                                         | bpln_RS33905                                                                      | Transposase                                                                    | pfam01527              |
|                                         | bpln_RS10520                                                                      | IS66 Orf2 like protein                                                         | pfam05717              |
| <i>P. aeruginosa</i><br>SCV20265        | ---                                                                               | ---                                                                            | ---                    |

**Table S5.** Mobile genetic elements and tRNA genes surrounding the *bcm* cluster in different bacteria.

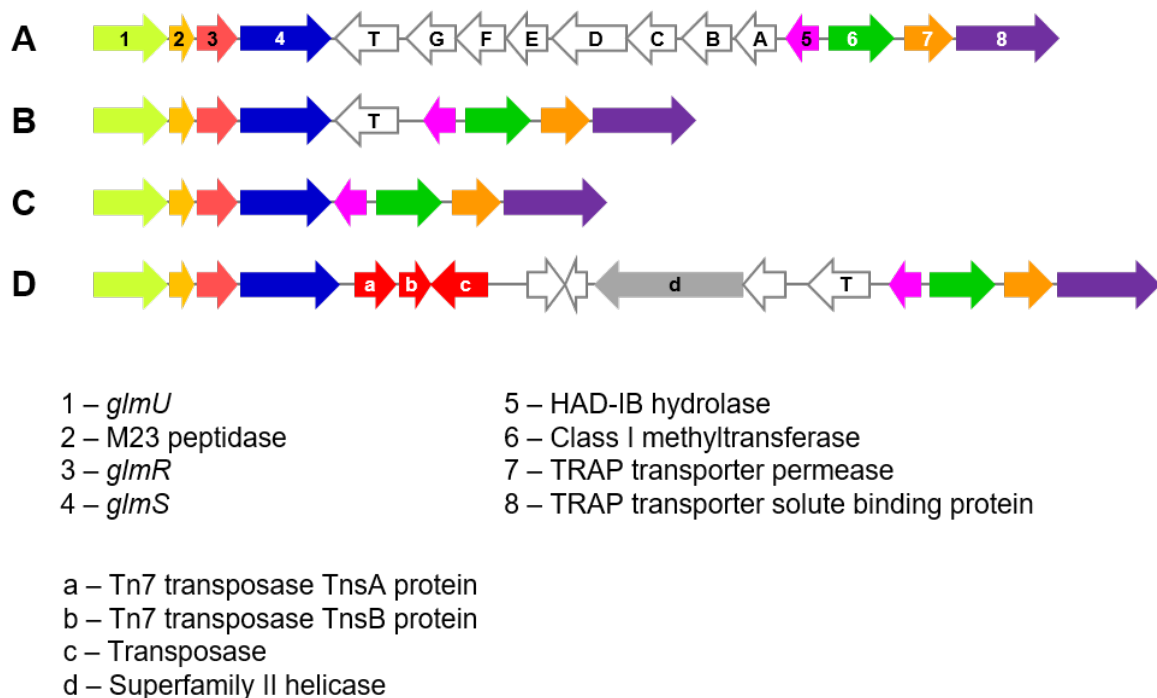

**Figure S11.** Genomic context of the *bcm* cluster (genes A to T) in *P. aeruginosa* and synteny of its flanking genes. (A) Schematic representation of the genes surrounding the *bcm* cluster in all *bcm*-positive *P. aeruginosa* strains, including SCV20265, M18 and ATCC 14886. (B) Organization of the flanking genes in *bcm*-minus strains that feature a *bcmT* homolog (99% identity, 100% coverage) adjacent to *glmS*, including *P. aeruginosa* PAO1 (AE004091), PA14 (ASWV01000021), ATCC 700888 (AKZF01000541) and LESB58 (FM209186). (C) Example of genetic organization where the flanking genes are contiguous to each other, observed in *P. aeruginosa* PA7 (CP000744) and VRFPA01 (AOBK01000101). (D) Genetic organization in *P. aeruginosa* BL08 (NZ\_KI518902), where elements of transposon Tn7 along with a *bcmT* homolog are present instead of the full *bcm* cluster. *bcm* flanking genes are identified by numbers while insertion genes are labelled with lowercase letters. Products encoded by these genes are listed in the legend.

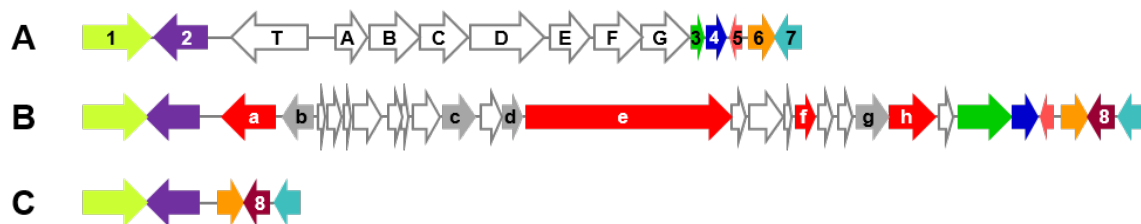

1 – TQXA domain-containing protein  
 2 – Histidinol-phosphate transaminase  
 3 – HMGL-like protein  
 4 – Hypothetical protein

5 – Hypothetical protein  
 6 – SRPBCC domain-containing protein  
 7 – TetR transcriptional regulator  
 8 – N-acetyltransferase

a – Integrase  
 b – DUF1537 protein  
 c – HTH domain-containing protein  
 d – HTH domain-containing protein

e – Phage tail tape measure protein TP901 family  
 f – HNH endonuclease  
 g – SAM-dependent methyltransferase  
 h – uncharacterized phage associated protein

**Figure S12.** Genomic context of the *bcm* cluster (genes T to G) in *Mycobacterium* and synteny of its flanking genes. (A) Schematic representation of the genes surrounding the *bcm* cluster in *M. chelonae* CCUG 47445. (B) Organization of the same genomic area in *M. abscessus* ATCC 19977 (CU458896) and 6G-0125-R (AKUE01000005) where the *bcm* genes are substituted by a cluster of uncharacterized and phage-associated genes. (C) Gene organization observed in several isolates of *M. abscessus* subsp. *bolletii* (including accessions AKUO01000002, AKUL01000005 and AGQU01000004), where the *bcm* cluster and some of its flanking genes are absent, and no phage is integrated. *bcm* flanking genes are identified by numbers while insertion genes are labelled with lowercase letters. Products encoded by these genes are listed in the legend.

10 20 30

BcmF\_Scin\_ MT TVVDNE.....GHLH LPT ARVT AGRL LF DAAE GAD QAL  
 BcmC\_Scin\_ VS TETLR..... LQK ARAT EEG LAF ETPG GLTR AL  
 bcmE\_Scin\_ .MASPDSATLREPVLPPMPGGEHEARAAAYPPIG.... LERS RVT GGR LVF DRDE GFDR AL  
 BcmB\_Scin\_ MS RAPGNTAAPEIRRGRIYRDLYEKRASGPAVQGDAL LER ARIQ GDR LEF AGSRARET AL  
 BcmG\_Scin\_ MS TAQGYG..... WQT AAL RGG LNF STPG GIE QAL

40 50 60 70 80 90

BcmF\_Scin\_ AL GAF C LA V PED LD VEP GLR FCR SF YEP.. AE PGT ADR YRG HR EDGHA... DSKL GY ED R  
 BcmC\_Scin\_ RD GCF LL AV P PGF D TTP GVT LCR E FFRPVEQG G E STRA YRG FR DLDGV..... YFD R  
 bcmE\_Scin\_ AQ GFF LV RI P EGT DPAA GDR FAAH FHEE. RAG GD PLDA YRG YR HVRVP... GDYQ GY FD R  
 BcmB\_Scin\_ ADC VELLE I PAD IDVAA GDA FS RQ FHL... G PDS P. P YGR FRD LGS EHF GPD LL GF HQR  
 BcmG\_Scin\_ RD GFF FH VE QE EGI DLT AG DR F AR G F YLP.. GE PDS TD P FR GF Q HW T SER L. GPRQ GY C R

100 110 120 130 140 150

BcmF\_Scin\_ .PD QVE Q LQ LE SHL WSR YL PEE VTAL LERM KD LTLD AL YG VFDV AG IPE HDRET VTGG AR  
 BcmC\_Scin\_ EHF QTE HVL ID GPGR ERHF PPE LTR MAE HM ELARH VLR TVL TE LG VARELWSE VTGG AV  
 bcmE\_Scin\_ EHD QWEN FY VE RDN WD. VLP SE V AR VGR GMAG LGVT ILRG VLEHL LR LP REHWAR VTGG LT  
 BcmB\_Scin\_ .VN QIE Q FL ER RF WAS DY PPE IAR LGE QL TR LS QK VLCAV LSH VG VPER DRRR ATGG CS  
 BcmG\_Scin\_ DDD QTE QFF LE SAH WDS VY PQA IAR QAE MRS LALD VLR A VLAH LE LP PELWDE ATGR CL

160 170 180 190 200 210

BcmF\_Scin\_ QDT GLCYTTV NH YRAD LSDRA GIVE HSD SGFI TLICTD QP GYE I LHE GRWRP VREE PGHF  
 BcmC\_Scin\_ DGR GTEWFA ANHYR SERDRL. GCAP HKD TG FVTVLY IEE GLEA ATGGS WTP VDPV PGCF  
 bcmE\_Scin\_ EDR GHQMLA FNH ER SHK GVR. GSK FHR DSGW VTVLRS VDP GLL ALVD GRLWA VDPE PGHF  
 BcmB\_Scin\_ RAA GSYHLTF NH YRPE HRDV. GLSS HKDD GFL TIL RIT TP GLEV NNR KDR WER VPVD PDCE  
 BcmG\_Scin\_ SAR GTYNLTF NH ERPE VPRR. GLNV HKD SGW VTVLRS TD P GLEV ERD GA WHPI IDPR PGTF

220 230 240 250 260

BcmF\_Scin\_ VVN I GDA FRV LT RKLP RPVT AVY HRV PELRPDGA. AH HRS SFTIY... MGP RYDMM LHQ  
 BcmC\_Scin\_ VVNF GGAF ELLT SGLDR PV RAL LHRV RQC APRPE. SAD RFS FAAF... VNPPPTGD LYR  
 bcmE\_Scin\_ IVNF GSS LEV LTER LDR PV RAN VHG VSTERAPG. QPDR TS YVT F... LDSDLTGT VYR  
 BcmB\_Scin\_ VIN FGLSME IILTAPT KAPVAA IMHRVARQ..... GGD RS SF GH FSSSGCAPGMDEG VFR  
 BcmG\_Scin\_ IVNF GCAI EILT RDTRTPVAAVAHRV VQQPRTDERKP DRF SYAL FVDSS LDEDICPG LFR

270 280 290

BcmF\_Scin\_ YAADGT L HEYQGFR DFS VEKSKKLGYEF.....HSRI.....  
 BcmC\_Scin\_ VGADGT A TVARSTE DFL RDNERT. WGDGYADFGIAPPEPAGVAEDGVRA  
 bcmE\_Scin\_ FE. NGTFRPLQSV AEF A GQEVGRT. YDD.....SGAL.....  
 BcmB\_Scin\_ YLPGSG LDRVCGSR ELI DENDHEI. YAG.....TDAPGDKRREH.....  
 BcmG\_Scin\_ YEPGTG L RLETNFGT FL D TILHNT. YQK.....DTAGLY.....

|           | BcmF_Scin | BcmC_Scin | BcmE_Scin | BcmB_Scin | BcmG_Scin |
|-----------|-----------|-----------|-----------|-----------|-----------|
| BcmF_Scin | 100       | 33.1      | 34.2      | 34.3      | 32.4      |
| BcmC_Scin | 33.1      | 100       | 37.8      | 31.1      | 38.7      |
| BcmE_Scin | 34.2      | 37.8      | 100       | 31.9      | 42.0      |
| BcmB_Scin | 34.3      | 31.1      | 31.9      | 100       | 42.1      |
| BcmG_Scin | 32.4      | 38.7      | 42.0      | 42.1      | 100       |

**Figure S13.** Alignment and percentage identity matrix of the *bcm* 2-OG/Fe-dioxygenases from *S. cinnamoneus*. Figure generated using Esript 3.0 (2).

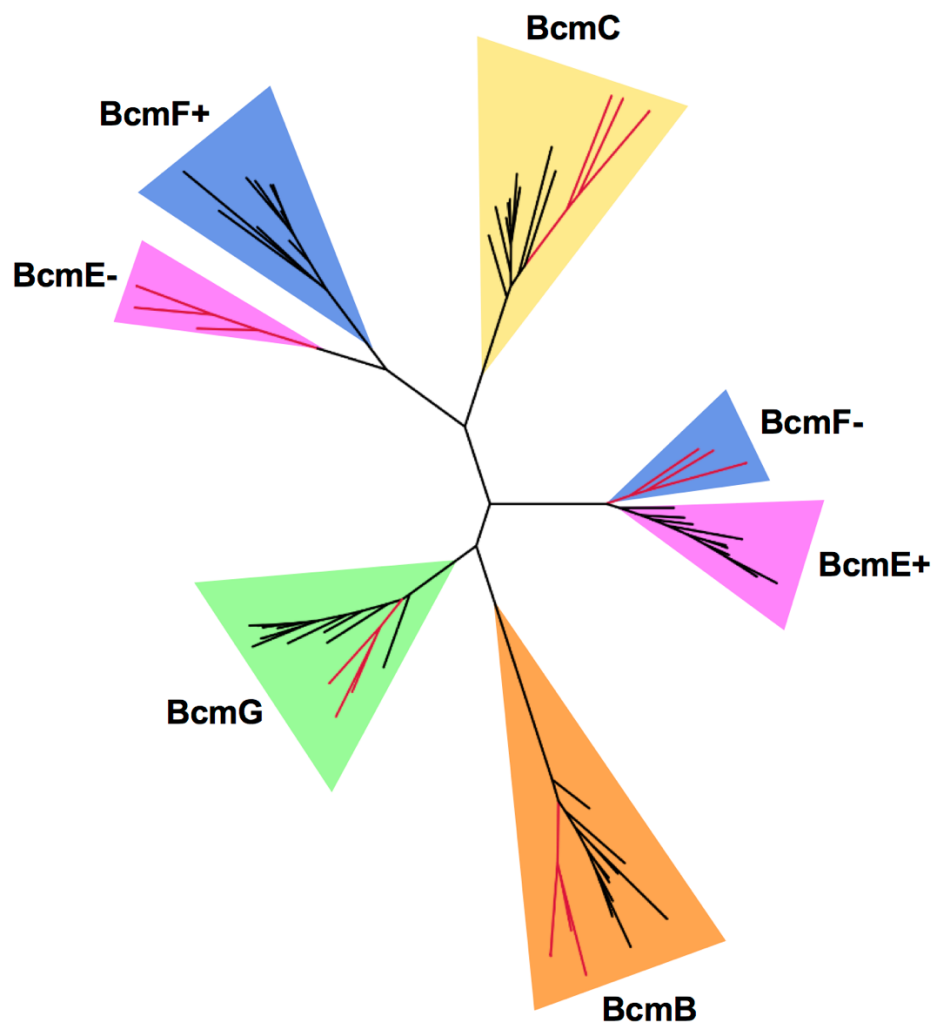

**Figure S14.** Unrooted version of the phylogenetic tree shown in Fig. 6 without the outgroup. Clade and branch colors are the same as those in Fig. 6.

## SUPPLEMENTARY REFERENCES

1. Jacques IB, Moutiez M, Witwinowski J, Darbon E, Martel C, Seguin J, Favry E, Thai R, Lecoq A, Dubois S, Pernodet J-L, Gondry M, Belin P. 2015. Analysis of 51 cyclodipeptide synthases reveals the basis for substrate specificity. *Nat Chem Biol* 11:721–727.
2. Robert X, Gouet P. 2014. Deciphering key features in protein structures with the new ENDscript server. *Nucleic Acids Res* 42:W320–W324.
3. Kohn H, Abuzar S, Korp JD, Zektzer AS, Martin GE. 1988. Structural studies of bicyclomycin. *J Heterocyclic Chem* 25:1511–1517.
